# Supplementary material for: Bone mesenchymal stem cell-derived exosomes prevent hyperoxia-induced apoptosis of primary type II alveolar epithelial cells in vitro
Source: PeerJ. 2022 Sep 2;10:e13692. doi: 10.7717/peerj.13692 (PMC9443791; doi:10.7717/peerj.13692)
Supplement: Data S1 [file peerj-10-13692-s001.xlsx]

## Sheet: Sheet1
CCK8
	NC			Hyperoxia			Hyperoxia+Exosome			Hyperoxia+Exosome+LY294002			Hyperoxia+Exosome+Rapamycin
	A1	A2	A3	B1	B2	B3	C1	C2	C3	D1	D2	D3	E1	E2	E3
24h	0.32	0.38	0.35	0.32	0.29	0.3	0.36	0.38	0.37	0.33	0.32	0.28	0.3	0.29	0.31
48h	0.57	0.51	0.55	0.41	0.39	0.43	0.54	0.51	0.54	0.4	0.35	0.37	0.32	0.36	0.37
72h	0.87	0.94	0.92	0.52	0.55	0.54	0.77	0.79	0.85	0.53	0.51	0.52	0.49	0.55	0.53
WB
	NC			Hyperoxia			Hyperoxia+Exosome			Hyperoxia+Exosome+LY294002			Hyperoxia+Exosome+Rapamycin
	A1	A2	A3	B1	B2	B3	C1	C2	C3	D1	D2	D3	E1	E2	E3
p-PI3K/PI3K	0.44	0.41	0.46	0.15	0.17	0.16	0.34	0.42	0.38	0.33	0.36	0.41	0.35	0.45	0.41
p-AKT/AKT	1.54	1.65	1.51	0.13	0.12	0.16	1.24	1.38	1.26	0.08	0.19	0.13	1.31	1.19	1.21
p-mTOR/mTOR	1.12	1.03	1.08	0.53	0.43	0.48	1.08	0.96	0.92	0.24	0.18	0.26	0.16	0.17	0.21
Bax/Bcl2	1.32	1.47	1.42	2.32	2.15	1.94	1.21	1.35	1.26	2.24	2.16	2.23	1.93	2.03	2.16
Apoptosis
	NC			Hyperoxia			Hyperoxia+Exosome			Hyperoxia+Exosome+LY294002			Hyperoxia+Exosome+Rapamycin
	A1	A2	A3	B1	B2	B3	C1	C2	C3	D1	D2	D3	E1	E2	E3
Apoptosis	1.2	1	1.5	17.6	16.2	18.1	3.6	3.9	4.1	13.9	12.6	14.7	14.8	16.2	15.5
ki67
	NC			Hyperoxia			Hyperoxia+Exosome			Hyperoxia+Exosome+LY294002			Hyperoxia+Exosome+Rapamycin
	A1	A2	A3	B1	B2	B3	C1	C2	C3	D1	D2	D3	E1	E2	E3
ki67	0.24	0.35	0.26	0.11	0.18	0.16	0.32	0.28	0.37	0.14	0.16	0.13	0.15	0.16	0.18
